# Supplementary material for: New recombinant cyclohexylamine oxidase variants for deracemization of secondary amines by orthogonally assaying designed mutants with structurally diverse substrates
Source: PubMed Central journal article supplement (PMC4853734; doi:10.1038/srep24973), 2016-05-03
Supplement: srep24973-s1.pdf [file srep24973-s1.pdf]

# New recombinant cyclohexylamine oxidase variants for deracemization of secondary amines by orthogonally assaying designed mutants with structurally diverse substrates

Guangyue Li<sup>†,1</sup>, Peiyuan Yao<sup>†,1</sup>, Peiqian Cong<sup>1</sup>, Jie Ren<sup>1</sup>, Lei Wang<sup>1</sup>, JinhuiFeng<sup>1</sup>, Peter C.K. Lau<sup>\*,1,2</sup>, Qiaqing Wu<sup>\*,1</sup>, and Dunming Zhu<sup>\*,1</sup>

<sup>1</sup> National Engineering Laboratory for Industrial Enzymes and Tianjin Engineering Center for Biocatalytic Technology, Tianjin Institute of Industrial Biotechnology, Chinese Academy of Sciences, 32 Xi Qi Dao, Tianjin Airport Economic Area, Tianjin 300308, PR China

<sup>2</sup>Departments of Chemistry and Microbiology & Immunology, McGill University, Montreal, Quebec, H3A2B4, Canada

<sup>†</sup>The authors contributed equally to this work

## Contents

|                                                                                                                                             |    |
|---------------------------------------------------------------------------------------------------------------------------------------------|----|
| Table S1 List of mutants .....                                                                                                              | 2  |
| Table S2 Substrate specificity of the mutant enzymes .....                                                                                  | 2  |
| Table S3 Primers used for mutation.....                                                                                                     | 8  |
| Fig. S1 <sup>1</sup> H-NMR spectra of 1-(4-methoxybenzyl)-1, 2, 3, 4, 5, 6, 7, 8-octahydroisoquinoline ( <b>13</b> ).....                   | 11 |
| Fig. S2 <sup>13</sup> C-NMR spectra of 1-(4-methoxybenzyl)-1, 2, 3, 4, 5, 6, 7, 8-octahydroisoquinoline ( <b>13</b> ).....                  | 12 |
| Fig. S3 SDS-PAGE analysis of the cell-free extracts of CHAO and mutants.....                                                                | 12 |
| Fig. S4 SDS-PAGE analysis of the purified CHAO and mutants .....                                                                            | 13 |
| Fig. S5 <sup>1</sup> H-NMR spectra of ( <i>S</i> )- <i>N</i> -(prop-2-yn-1-yl)-2, 3-dihydro-1H-inden-1-amine (( <i>R</i> )-8) .....         | 13 |
| Fig. S6 <sup>13</sup> C-NMR spectra of ( <i>S</i> )- <i>N</i> -(prop-2-yn-1-yl)-2, 3-dihydro-1H-inden-1-amine (( <i>R</i> )-8) .....        | 14 |
| Fig. S7 <sup>1</sup> H-NMR spectra of ( <i>S</i> )-1-(4-methoxybenzyl)-1, 2, 3, 4, 5, 6, 7, 8-octahydroisoquinoline (( <i>S</i> )-13).....  | 14 |
| Fig. S8 <sup>13</sup> C-NMR spectra of ( <i>S</i> )-1-(4-methoxybenzyl)-1, 2, 3, 4, 5, 6, 7, 8-octahydroisoquinoline (( <i>S</i> )-13)..... | 15 |

**Table S1** List of mutants

| T198  | L199  | M226  | Y321  | F351  | F368  | Y459  |
|-------|-------|-------|-------|-------|-------|-------|
| T198A | L199A | M226A | Y321A | F351A | F368A | Y459A |
| T198D | L199D | M226D | Y321D | F351D | F368D | Y459D |
| T198K | L199K | M226K | Y321K | F351K | F368K | Y459K |
| T198F | L199T | M226T | Y321T | F351T | F368T | Y459T |
| T198I | L199I | M226I | Y321I | F351Y | F368Y | Y459I |
| T198W | L199F | M226F | Y321F | F351I | F368I | Y459F |
| T198Y | L199Y | M226Y | Y321W | F351W | F368W | Y459W |
|       | L199W | M226W |       |       |       |       |

**Table S2** Substrate specificity of the mutant enzymes

**A.** Substrate specificity of CHAO mutants at 198. The activity of CHAO for (*S*)-1-phenylethanamine was defined as 100% (3.5U/mg) and the result showed in sequence of CHAO/198A/198D/198I/198F/198K/198Y/198W.

|                                                                                      |                                                                                     |                                                                                     |                                                                                       |                                                                                       |
|--------------------------------------------------------------------------------------|-------------------------------------------------------------------------------------|-------------------------------------------------------------------------------------|---------------------------------------------------------------------------------------|---------------------------------------------------------------------------------------|
| 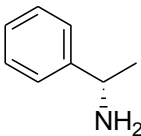  |  |  |  |  |
| ( <i>S</i> )-1                                                                       | ( <i>S</i> )-2                                                                      | ( <i>S</i> )-3                                                                      | ( <i>S</i> )-4                                                                        | ( <i>R</i> )-1                                                                        |
| 100±6.91/113.26±4.06/77.23±4.76/134.46±5.23/10.11±0.13/1.12±0.02/2.70±0.02/0.79±0.01 | 87.31±5.30/90.87±5.21/20.95±1.53/93.12±0.97/9.11±0.62/2.44±1.29/2.20±0.19/1.65±0.02 | 46.74±3.30/36±2.78/12.25±0.62/64.66±4.50/14.21±0.42/0.79±0.05/2.22±0.14/2.48±0.55   | 47.95±2.24/52.71±1.23/20.95±3.98/43.76±1.78/3.96±0.21/0.26±0.05/1.05±0.24/0.21±0.05   | T/T/T/T/T/T/T/T                                                                       |
|   |  |  |  |  |
| ( <i>R</i> )-2                                                                       | ( <i>R</i> )-4                                                                      | 5                                                                                   | ( <i>S</i> )-6                                                                        | ( <i>S</i> )-7                                                                        |
| T/T/T/T/T/T/T/T                                                                      | T/T/T/T/T/T/T/T                                                                     | T/T/T/0.72±0.05/T/T/T/T                                                             | N/N/N/N/N/N/N/N                                                                       | 0.36±0.05/1.53±0.05/T/T/T/T/T/T                                                       |
|   |  |  |  |  |
| ( <i>S</i> )-8                                                                       | ( <i>R</i> )-8                                                                      | ( <i>R</i> )-7                                                                      | 9                                                                                     | 10                                                                                    |
| N/N/N/N/N/N/N/N                                                                      | N/N/N/N/N/N/N/N                                                                     | N/N/N/N/N/N/N/N                                                                     | N/N/N/N/N/N/N/N                                                                       | T/T/T/T/1.45±0.21/T/T/T                                                               |

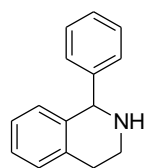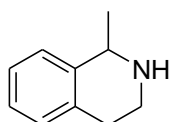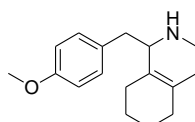

| 11            | 12            | 13                      |
|---------------|---------------|-------------------------|
| T/T/T/T/T/T/T | T/T/T/T/T/T/T | T/T/T/0.49±0.08/T/T/T/T |

T, trace activity (below 0.1%).

N, the activity was not detected.

**B.** Substrate specificity of CHAO mutants at 199. The activity of CHAO for (*S*)-1-phenylethylamine was defined as 100% (3.5U/mg) and the result showed in sequence of CHAO/199A/199K/199T/199I/199F/199Y.

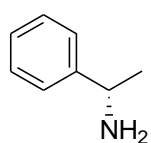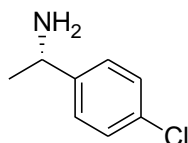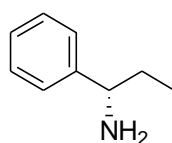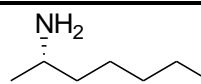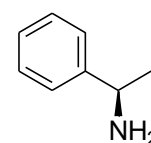

| (S)-1                      | (S)-2                      | (S)-3                    | (S)-4                  | (R)-1         |
|----------------------------|----------------------------|--------------------------|------------------------|---------------|
| 100±5.35/40.91±3.12/1.1±0. | 83.32±7.04/13.61±1.25/3.12 | 42.55±1.57/5.91±0.14/0.6 | 49.82±4.38/25.23±3.19/ | T/T/T/T/T/T/T |
| 042/28.26±1.23/134.22±6.74 | ±0.15/44.72±5.34/112.2±11. | 3±0.02/6.25±0.71/84.91±7 | 1.13±0.04/22.35±4.01/6 |               |
| /178.33±8.34/21.41±2.01    | 24/145.42±11.54/27.91±4.01 | .64/71.92±3.54/4.62±0.08 | 9.33±5.43/104.83±6.75/ |               |
|                            |                            |                          | 9.13±0.43              |               |

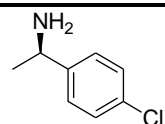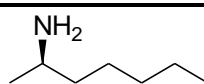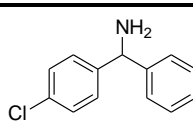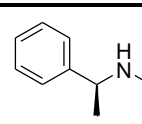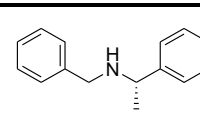

| (R)-2         | (R)-4         | 5             | (S)-6         | (S)-7                   |
|---------------|---------------|---------------|---------------|-------------------------|
| T/T/T/T/T/T/T | T/T/T/T/T/T/T | T/T/T/T/T/T/T | N/N/N/N/N/N/N | 0.32±0.01/N/N/N/0.93±0. |
|               |               |               |               | 04/0.44±0.02/N          |

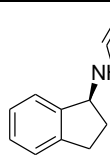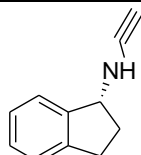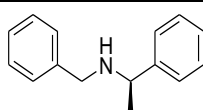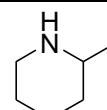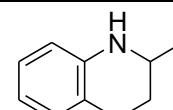

| (S)-8         | (R)-8         | (R)-7         | 9             | 10                    |
|---------------|---------------|---------------|---------------|-----------------------|
| N/N/N/N/N/N/N | N/N/N/N/N/N/N | N/N/N/N/N/N/N | N/N/N/N/N/N/N | T/T/T/2.23±0.08/T/T/T |

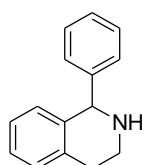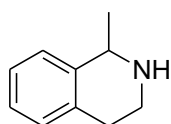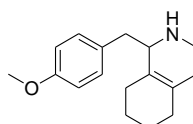

| 11            | 12            | 13            |
|---------------|---------------|---------------|
| T/T/T/T/T/T/T | T/T/T/T/T/T/T | T/T/T/T/T/T/T |

T, trace activity (below 0.1%).

N, the activity was not detected.

**C.** Substrate specificity of CHAO mutants at 226. The activity of CHAO for (*S*)-1-phenylethanamine was defined as 100% (3.5U/mg) and the result showed in sequence of CHAO/226A/226F/226I/226Y/226T/226K.

|                                                                                     |                                                                                     |                                                                                     |                                                                                       |                                                                                       |
|-------------------------------------------------------------------------------------|-------------------------------------------------------------------------------------|-------------------------------------------------------------------------------------|---------------------------------------------------------------------------------------|---------------------------------------------------------------------------------------|
| 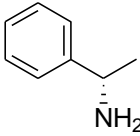   |    |    |    |    |
| ( <i>S</i> )-1                                                                      | ( <i>S</i> )-2                                                                      | ( <i>S</i> )-3                                                                      | ( <i>S</i> )-4                                                                        | ( <i>R</i> )-1                                                                        |
| 100±3.82/116.97±1.71/114.1                                                          | 84.46±0.52/104.11±6.95/5                                                            | 49.28±3.22/69.22±7.22/46                                                            | 42.17±1.77/60.59±2.55/64                                                              | T/T/T/T/T/T                                                                           |
| 4±1.28/116.10±3.09/84.78±3                                                          | 5.59±3.14/100.93±5.97/38                                                            | .46±1.78/51.54±2.19/30.4                                                            | .14±3.37/69.26±2.75/34.6                                                              |                                                                                       |
| .81/103.41±1.26/108.94±1.                                                           | .67±3.38/90.88±1.69/76.2                                                            | 4±3.58/97.85±2.42/52.64±                                                            | 6±5.21/75.03±7.66/18.26±                                                              |                                                                                       |
| 65                                                                                  | 0±2.56                                                                              | 2.63                                                                                | 2.28                                                                                  |                                                                                       |
|    |    |    |    |    |
| ( <i>R</i> )-2                                                                      | ( <i>R</i> )-4                                                                      | 5                                                                                   | ( <i>S</i> )-6                                                                        | ( <i>S</i> )-7                                                                        |
| T/T/T/T/T/T                                                                         | T/T/T/T/T/T                                                                         | T/T/T/T/T/T                                                                         | N/N/N/N/N/0.51±0.06/N                                                                 | 0.53±0.07/1.39±0.12/T/T/<br>T/0.93±0.07/T                                             |
|  |  |  |  |  |
| ( <i>S</i> )-8                                                                      | ( <i>R</i> )-8                                                                      | ( <i>R</i> )-7                                                                      | 9                                                                                     | 10                                                                                    |
| N/N/N/N/N/0.48±0.02/N                                                               | N/N/N/N/N/N                                                                         | N/N/N/N/N/N                                                                         | N/N/N/N/N/N                                                                           | T/T/0.94±0.03/T/T/T/T                                                                 |
|  |  |  |                                                                                       |                                                                                       |
| 11                                                                                  | 12                                                                                  | 13                                                                                  |                                                                                       |                                                                                       |
| T/T/T/T/T/T                                                                         | T/T/T/T/T/T                                                                         | T/T/T/T/T/T                                                                         |                                                                                       |                                                                                       |

T, trace activity (below 0.1%).

N, the activity was not detected.

**D.** Substrate specificity of CHAO mutants at Y321. The activity of CHAO for (*S*)-1-phenylethanamine was defined as 100% (3.5U/mg) and the result showed in sequence of CHAO/321A/321K/321T/321I/321F.

|                                                                                     |                                                                                     |                                                                                     |                                                                                     |                                                                                     |
|-------------------------------------------------------------------------------------|-------------------------------------------------------------------------------------|-------------------------------------------------------------------------------------|-------------------------------------------------------------------------------------|-------------------------------------------------------------------------------------|
| 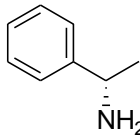   |    |    |   |  |
| (S)-1                                                                               | (S)-2                                                                               | (S)-3                                                                               | (S)-4                                                                               | (R)-1                                                                               |
| 100±9.08/52.53±6.58/5.6                                                             | 84.62±7.32/12.13±0.16/1.9                                                           | 43.13±1.59/32.32±0.78/2.93±0                                                        | 46.26±3.34/7.76±0.17/0                                                              | T/T/T/T/T                                                                           |
| 3±0.41/20.86±1.28/86.24                                                             | 4±0.12/10.62±0.18/36.93±                                                            | .15/26.16±1.67/84.22±5.07/29.                                                       | .82±0.07/2.31±0.16/19.                                                              |                                                                                     |
| ±6.25/62.23±4.73                                                                    | 0.52/26.86±0.95                                                                     | 56±0.93                                                                             | 16±0.91/14.11±0.96                                                                  |                                                                                     |
|    |    |    |   |  |
| (R)-2                                                                               | (R)-4                                                                               | 5                                                                                   | (S)-6                                                                               | (S)-7                                                                               |
| T/T/T/T/T                                                                           | T/T/T/T/T                                                                           | T/T/T/T/0.62±0.05/T                                                                 | N/N/N/N/N                                                                           | 0.36±0.04/T/T/T/T/T                                                                 |
|    |    |    |  |  |
| (S)-8                                                                               | (R)-8                                                                               | (R)-7                                                                               | 9                                                                                   | 10                                                                                  |
| N/N/N/N/0.37±0.08/N                                                                 | N/N/N/N/N                                                                           | N/N/N/N/N                                                                           | N/N/N/N/N                                                                           | T/T/T/T/T                                                                           |
|  |  |  |                                                                                     |                                                                                     |
| 11                                                                                  | 12                                                                                  | 13                                                                                  |                                                                                     |                                                                                     |
| T/T/T/T/T                                                                           | T/T/T/T/0.33±0.01/T                                                                 | T/1.21±0.02/T/1.34±0.12/2.55                                                        |                                                                                     |                                                                                     |
|                                                                                     |                                                                                     | ±0.05/1.33±0.14                                                                     |                                                                                     |                                                                                     |

T, trace activity (below 0.1%).

N, the activity was not detected.

**E.** Substrate specificity of CHAO mutants at F351. The activity of CHAO for (S)-1-phenylethylamine was defined as 100% (3.5U/mg) and the result showed in sequence of CHAO/351A/351T/351I/351K/351Y.

|                                                                                     |                                                                                     |                                                                                     |                                                                                      |                                                                                       |
|-------------------------------------------------------------------------------------|-------------------------------------------------------------------------------------|-------------------------------------------------------------------------------------|--------------------------------------------------------------------------------------|---------------------------------------------------------------------------------------|
| 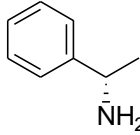 |  |  |  |  |
|-------------------------------------------------------------------------------------|-------------------------------------------------------------------------------------|-------------------------------------------------------------------------------------|--------------------------------------------------------------------------------------|---------------------------------------------------------------------------------------|

|                                                                                    |                                                                                    |                                                                                    |                                                                                     |                                                                                     |
|------------------------------------------------------------------------------------|------------------------------------------------------------------------------------|------------------------------------------------------------------------------------|-------------------------------------------------------------------------------------|-------------------------------------------------------------------------------------|
| (S)-1                                                                              | (S)-2                                                                              | (S)-3                                                                              | (S)-4                                                                               | (R)-1                                                                               |
| 100±6.41/28.25±0.38/3.0                                                            | 83.83±6.31/57.91±0.59/3.82                                                         | 42.35±1.42/22.23±0.84/1.5                                                          | 44.21±2.36/29.17±2.97/1.                                                            | T/T/T/T/T/T                                                                         |
| 6±0.03/10.51±0.39/6.03±                                                            | ±0.12/16.83±1.34/31.75±2.4                                                         | 9±0.21/9.16±0.89/2.71±0.2                                                          | 78±0.10/6.81±0.13/6.02±                                                             |                                                                                     |
| 0.04/89.56±9.38                                                                    | 3/67.13±6.83                                                                       | 1/54.82±2.96                                                                       | 0.95/40.43±6.33                                                                     |                                                                                     |
| 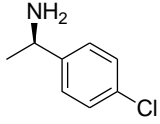  |   |   |   |  |
| (R)-2                                                                              | (R)-4                                                                              | 5                                                                                  | (S)-6                                                                               | (S)-7                                                                               |
| T/T/T/T/T/T                                                                        | T/T/T/T/T/T                                                                        | T/T/T/T/T/T                                                                        | N/N/N/N/N/N                                                                         | 0.36±0.03/T/T/T/T/T                                                                 |
|   |   |   |  |  |
| (S)-8                                                                              | (R)-8                                                                              | (R)-7                                                                              | 9                                                                                   | 10                                                                                  |
| N/N/N/N/N/N                                                                        | N/N/N/N/N/N                                                                        | N/N/N/N/N/N                                                                        | N/N/N/N/N/N                                                                         | T/T/T/T/T/T                                                                         |
|  |  |  |                                                                                     |                                                                                     |
| 11                                                                                 | 12                                                                                 | 13                                                                                 |                                                                                     |                                                                                     |
| T/T/T/T/T/T                                                                        | T/T/T/T/T/T                                                                        | T/T/T/T/T/T                                                                        |                                                                                     |                                                                                     |

T, trace activity (below 0.1%).

N, the activity was not detected.

**F. Substrate specificity of CHAO mutants at Y368.** The activity of CHAO for (S)-1-phenylethylamine was defined as 100% (3.5U/mg) and the result showed in sequence of CHAO/368A/368T/368I/368Y/368K/368D/368W.

|                                                                                     |                                                                                     |                                                                                     |                                                                                      |                                                                                       |
|-------------------------------------------------------------------------------------|-------------------------------------------------------------------------------------|-------------------------------------------------------------------------------------|--------------------------------------------------------------------------------------|---------------------------------------------------------------------------------------|
| 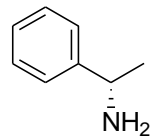 |  |  |  |  |
| (S)-1                                                                               | (S)-2                                                                               | (S)-3                                                                               | (S)-4                                                                                | (R)-1                                                                                 |
| 100±6.12/15.04±1.65/4.58                                                            | 82.34±4.19/7.08±1.07/3.20±                                                          | 45.83±1.27/12.05±0.86/21.                                                           | 44.04±3.81/3.41±0.56/0.7                                                             | T/T/T/T/T/T/T                                                                         |
| ±0.16/2.02±0.25/1.85±0.2                                                            | 0.42/1.16±0.13/1.76±0.45/9.                                                         | 49±1.36/12.63±0.57/2.64±                                                            | 4±0.16/T/2.22±0.47/8.72±                                                             |                                                                                       |
| 1/14.25±1.82/0.97±0.05/4.                                                           | 89±0.30/1.38±0.13/4.09±0.3                                                          | 0.21/6.93±0.15/0.56±0.05/                                                           | 0.81/0.15±0.02/3.47±0.59                                                             |                                                                                       |
| 79±0.16                                                                             | 8                                                                                   | 2.77±0.38                                                                           |                                                                                      |                                                                                       |

|               |               |               |               |                       |
|---------------|---------------|---------------|---------------|-----------------------|
|               |               |               |               |                       |
| (R)-2         | (R)-4         | 5             | (S)-6         | (S)-7                 |
| T/T/T/T/T/T/T | T/T/T/T/T/T/T | T/T/T/T/T/T/T | N/N/N/N/N/N/N | 0.38±0.02/T/T/T/T/T/T |
|               |               |               |               |                       |
| (S)-8         | (R)-8         | (R)-7         | 9             | 10                    |
| N/N/N/N/N/N/N | N/N/N/N/N/N/N | N/N/N/N/N/N/N | N/N/N/N/N/N/N | T/T/T/T/T/T/T         |
|               |               |               |               |                       |
| 11            | 12            | 13            |               |                       |
| T/T/T/T/T/T/T | T/T/T/T/T/T/T | T/T/T/T/T/T/T |               |                       |

T, trace activity (below 0.1%).

N, the activity was not detected.

**G.** Substrate specificity of CHAO mutants at Y459. The activity of CHAO for (S)-1-phenylethylamine was defined as 100% (3.5U/mg) and the result showed in sequence of CHAO/459A/459D/459K/459T/459I/459F/459W.

|                                                                        |                                                           |                                      |                                      |                       |
|------------------------------------------------------------------------|-----------------------------------------------------------|--------------------------------------|--------------------------------------|-----------------------|
|                                                                        |                                                           |                                      |                                      |                       |
| (S)-1                                                                  | (S)-2                                                     | (S)-3                                | (S)-4                                | (R)-1                 |
| 100±5.36/6.71±0.87/0.55<br>±0.12/0.16±0.02/0.32±0.0<br>2/N/3.49±0.29/N | 83.76±6.21/80.11±4.1<br>8/5.11±0.51/N/N/N/7.<br>27±1.01/N | 42.77±3.58/2.59±0.25/N/<br>N/N/N/N/N | 44.56±3.26/3.14±0.15/N/<br>N/N/N/N/N | T/N/N/N/N/N/N/N       |
|                                                                        |                                                           |                                      |                                      |                       |
| (R)-2                                                                  | (R)-4                                                     | 5                                    | (S)-6                                | (S)-7                 |
| T/N/N/N/N/N/N                                                          | T/N/N/N/N/N/N                                             | T/N/N/N/N/N/N                        | T/N/N/N/N/N/N                        | 0.36±0.02/N/N/N/N/N/N |

|                                                                                   |                                                                                   |                                                                                   |                                                                                    |                                                                                     |
|-----------------------------------------------------------------------------------|-----------------------------------------------------------------------------------|-----------------------------------------------------------------------------------|------------------------------------------------------------------------------------|-------------------------------------------------------------------------------------|
| 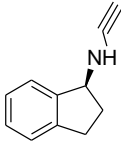 |  |  |  |  |
| (S)-8                                                                             | (R)-8                                                                             | (R)-7                                                                             | 9                                                                                  | 10                                                                                  |
| N/N/N/N/N/N/N                                                                     | N/N/N/N/N/N/N                                                                     | N/N/N/N/N/N/N                                                                     | N/N/N/N/N/N/N                                                                      | T/N/N/N/3.41 ± 0.21/N/N/N                                                           |
|  |  |  |                                                                                    |                                                                                     |
| 11                                                                                | 12                                                                                | 13                                                                                |                                                                                    |                                                                                     |
| T/N/N/N/N/N/N                                                                     | T/N/N/N/N/N/N                                                                     | T/N/N/N/N/N/N                                                                     |                                                                                    |                                                                                     |

T, trace activity (below 0.1%).

N, the activity was not detected.

**Table S3** Primers used for mutation

| Primer   | sequence(5'to3')                      |
|----------|---------------------------------------|
| T198F-5' | ACGGTTATCGTCAATTTCTCCTCGGCGCCGA       |
| T198F-3' | TCGGCGCCGAGGAGGAAATTGACGATAACCGT      |
| T198A-5' | ACGGTTATCGTCAATGCGCTCCTCGGCGCCGA      |
| T198A-3' | TCGGCGCCGAGGAGCGCATTGACGATAACCGT      |
| T198W-5' | ACGGTTATCGTCAATTGGCTCCTCGGCGCCGA      |
| T198W-3' | TCGGCGCCGAGGAGCCAATTGACGATAACCGT      |
| T198I-5' | ACGGTTATCGTCAATATCCTCCTCGGCGCCGA      |
| T198I-3' | TCGGCGCCGAGGAGGATATTGACGATAACCGT      |
| T198Y-5' | ACGGTTATCGTCAATTATCTCCTCGGCGCCGA      |
| T198Y-3' | TCGGCGCCGAGGAGATAATTGACGATAACCGT      |
| T198K-5' | ACGGTTATCGTCAATAAGCTCCTCGGCGCCGA      |
| T198K-3' | TCGGCGCCGAGGAGCTTATTGACGATAACCGT      |
| T198D-5' | ACGGTTATCGTCAATGACCTCCTCGGCGCCGA      |
| T198D-3' | TCGGCGCCGAGGAGGTCATTGACGATAACCGT      |
| L199F-5' | GTTATCGTCAATACCTTCTCCTCGGCGCCGACCCCTA |
| L199F-3' | TAGGGGTCGGCGCCGAGGAAGGTATTGACGATAAC   |
| L199W-5' | GTTATCGTCAATACCTGGCTCGGCGCCGACCCCTA   |
| L199W-3' | TAGGGGTCGGCGCCGAGCCAGGTATTGACGATAAC   |



| <b>Primer</b> | <b>sequence(5'to3')</b>              |
|---------------|--------------------------------------|
| L199I-5'      | GTTATCGTCAATACCATCCTCGGGCGCCGACCCCTA |
| L199I-3'      | TAGGGGTCGGCGCCGAGGATGGTATTGACGATAAC  |
| L199Y-5'      | GTTATCGTCAATACCTATCTCGGGCGCCGACCCCTA |
| L199Y-3'      | TAGGGGTCGGCGCCGAGATAGGTATTGACGATAAC  |
| L199T-5'      | GTTATCGTCAATACCACCCTCGGGCGCCGACCCCTA |
| L199T-3'      | TAGGGGTCGGCGCCGAGGGTGGTATTGACGATAAC  |
| L199K-5'      | GTTATCGTCAATACCAAGCTCGGGCGCCGACCCCTA |
| L199K-3'      | TAGGGGTCGGCGCCGAGCTTGGTATTGACGATAAC  |
| L199D-5'      | GTTATCGTCAATACCGACCTCGGGCGCCGACCCCTA |
| L199D-3'      | TAGGGGTCGGCGCCGAGGTCGGTATTGACGATAAC  |
| L199A-5'      | GTTATCGTCAATACCGCGCTCGGGCGCCGACCCCTA |
| L199A-3'      | TAGGGGTCGGCGCCGAGCGCGGTATTGACGATAAC  |
| M226F 5'      | AAGGGATACAGTCACTCTTCGGCACCCGGGACGGA  |
| M226F 3'      | TCCGTCCCGGGTGCCGAAGAGTGACTGTATCCCTT  |
| M226W 5'      | AAGGGATACAGTCACTCTGGGGCACCCGGGACGGA  |
| M226W 3'      | TCCGTCCCGGGTGCCCCAGAGTGACTGTATCCCTT  |
| M226I 5'      | AAGGGATACAGTCACTCATCGGCACCCGGGACGGA  |
| M226I 3'      | TCCGTCCCGGGTGCCGATGAGTGACTGTATCCCTT  |
| M226Y 5'      | AAGGGATACAGTCACTCTATGGCACCCGGGACGGA  |
| M226Y 3'      | TCCGTCCCGGGTGCCATAGAGTGACTGTATCCCTT  |
| M226T 5'      | AAGGGATACAGTCACTCACCGGCACCCGGGACGGA  |
| M226T 3'      | TCCGTCCCGGGTGCCGGTGAGTGACTGTATCCCTT  |
| M226K 5'      | AAGGGATACAGTCACTCAAGGGCACCCGGGACGGA  |
| M226K 3'      | TCCGTCCCGGGTGCCCTTGAGTGACTGTATCCCTT  |
| M226D 5'      | AAGGGATACAGTCACTCGACGGCACCCGGGACGGA  |
| M226D 3'      | TCCGTCCCGGGTGCCGTCGAGTGACTGTATCCCTT  |
| M226A 5'      | AAGGGATACAGTCACTCGCGGGCACCCGGGACGGA  |
| M226A 3'      | TCCGTCCCGGGTGCCCCGAGTGACTGTATCCCTT   |
| Y321W 5'      | GCACCGATGGGCGCTGGTACAAGGTGCAGGC      |
| Y321W 3'      | GCCTGCACCTTGTACCAGCGGCCCATCGGTGC     |
| Y321I 5'      | GCACCGATGGGCGCATCTACAAGGTGCAGGC      |
| Y321I 3'      | GCCTGCACCTTGTAGATGCGGCCCATCGGTGC     |
| Y321T 5'      | GCACCGATGGGCGCACCTACAAGGTGCAGGC      |
| Y321T 3'      | GCCTGCACCTTGTAGGTGCGGCCCATCGGTGC     |

| Primer   | sequence(5'to3')                    |
|----------|-------------------------------------|
| Y321K 5' | GCACCGATGGGCCGCAAGTACAAGGTGCAGGC    |
| Y321K 3' | GCCTGCACCTTGTACTTGC GGCCCATCGGTGC   |
| Y321D 5' | GCACCGATGGGCCGCGACTACAAGGTGCAGGC    |
| Y321D 3' | GCCTGCACCTTGTAGTCGCGGCCCATCGGTGC    |
| Y321F 5' | GCACCGATGGGCCGCTTCTACAAGGTGCAGGC    |
| Y321F 3' | GCCTGCACCTTGTAGAAGCGGCCCATCGGTGC    |
| Y321A 5' | GCACCGATGGGCCGCGCGTACAAGGTGCAGGC    |
| Y321A 3' | GCCTGCACCTTGTACGCGGCCCATCGGTGC      |
| F351A 5' | GAAGACGTCGGAGTCGCGCTCCTCGACGGCACG   |
| F351A 3' | CGTGCCGTCGAGGAGCGCGACTCCGACGTCTTC   |
| F351W 5' | GAAGACGTCGGAGTCTGGCTCCTCGACGGCACG   |
| F351W 3' | CGTGCCGTCGAGGAGCCAGACTCCGACGTCTTC   |
| F351I 5' | GAAGACGTCGGAGTCATCCTCCTCGACGGCACG   |
| F351I 3' | CGTGCCGTCGAGGAGGATGACTCCGACGTCTTC   |
| F351Y 5' | GAAGACGTCGGAGTCTATCTCCTCGACGGCACG   |
| F351Y 3' | CGTGCCGTCGAGGAGATAGACTCCGACGTCTTC   |
| F351T 5' | GAAGACGTCGGAGTCACCCTCCTCGACGGCACG   |
| F351T 3' | CGTGCCGTCGAGGAGGGTACTCCGACGTCTTC    |
| F351K 5' | GAAGACGTCGGAGTCAAGCTCCTCGACGGCACG   |
| F351K 3' | CGTGCCGTCGAGGAGCTTGACTCCGACGTCTTC   |
| F351D 5' | GAAGACGTCGGAGTCGACCTCCTCGACGGCACG   |
| F351D 3' | CGTGCCGTCGAGGAGGTCGACTCCGACGTCTTC   |
| F368A 5' | AGCGACCCTAATTGGGGCGATCGGAGGGTCAAATT |
| F368A 3' | AATTTGACCCTCCGATCGCCCAATTAGGGTCGCT  |
| F368W 5' | AGCGACCCTAATTGGGTGGATCGGAGGGTCAAATT |
| F368W 3' | AATTTGACCCTCCGATCCACCAATTAGGGTCGCT  |
| F368I 5' | AGCGACCCTAATTGGGATCATCGGAGGGTCAAATT |
| F368I 3' | AATTTGACCCTCCGATGATCCCAATTAGGGTCGCT |
| F368Y 5' | AGCGACCCTAATTGGGTATATCGGAGGGTCAAATT |
| F368Y 3' | AATTTGACCCTCCGATATACCAATTAGGGTCGCT  |
| F368T 5' | AGCGACCCTAATTGGGACCATCGGAGGGTCAAATT |
| F368T 3' | AATTTGACCCTCCGATGGTCCAATTAGGGTCGCT  |
| F368K 5' | AGCGACCCTAATTGGGAAGATCGGAGGGTCAAATT |
| F368K 3' | AATTTGACCCTCCGATCTTCCAATTAGGGTCGCT  |
| F368D 5' | AGCGACCCTAATTGGGGACATCGGAGGGTCAAATT |
| F368D 3' | AATTTGACCCTCCGATGTCCCAATTAGGGTCGCT  |
| Y459W 5' | TCCAATGGTCCGGCTGGATGGAAGGTGGCGT     |
| Y459W 3' | ACGCCACCTTCCATCCAGCCGGACCATTGGA     |
| Y459I 5' | TCCAATGGTCCGGCATCATGGAAGGTGGCGT     |
| Y459I 3' | ACGCCACCTTCCATGATGCCGGACCATTGGA     |

| Primer   | sequence(5'to3')                 |
|----------|----------------------------------|
| Y459T 5' | TCCAATGGTCCGGCACCATGGAAGGTGGCGT  |
| Y459T 3' | ACGCCACCTTCCATGGTGCCGGACCATTGGA  |
| Y459K 5' | TCCAATGGTCCGGCAAGATGGAAGGTGGCGT  |
| Y459K 3' | ACGCCACCTTCCATCTTGCCGGACCATTGGA  |
| Y459D 5' | TCCAATGGTCCGGCGACATGGAAGGTGGCGT  |
| Y459D 3' | ACGCCACCTTCCATGTGCGCCGGACCATTGGA |
| Y459F 5' | TCCAATGGTCCGGCTTCATGGAAGGTGGCGT  |
| Y459F 3' | ACGCCACCTTCCATGAAGCCGGACCATTGGA  |
| Y459A 5' | TCCAATGGTCCGGCGCGATGGAAGGTGGCGT  |
| Y459A 3' | ACGCCACCTTCCATCGCGCCGGACCATTGGA  |

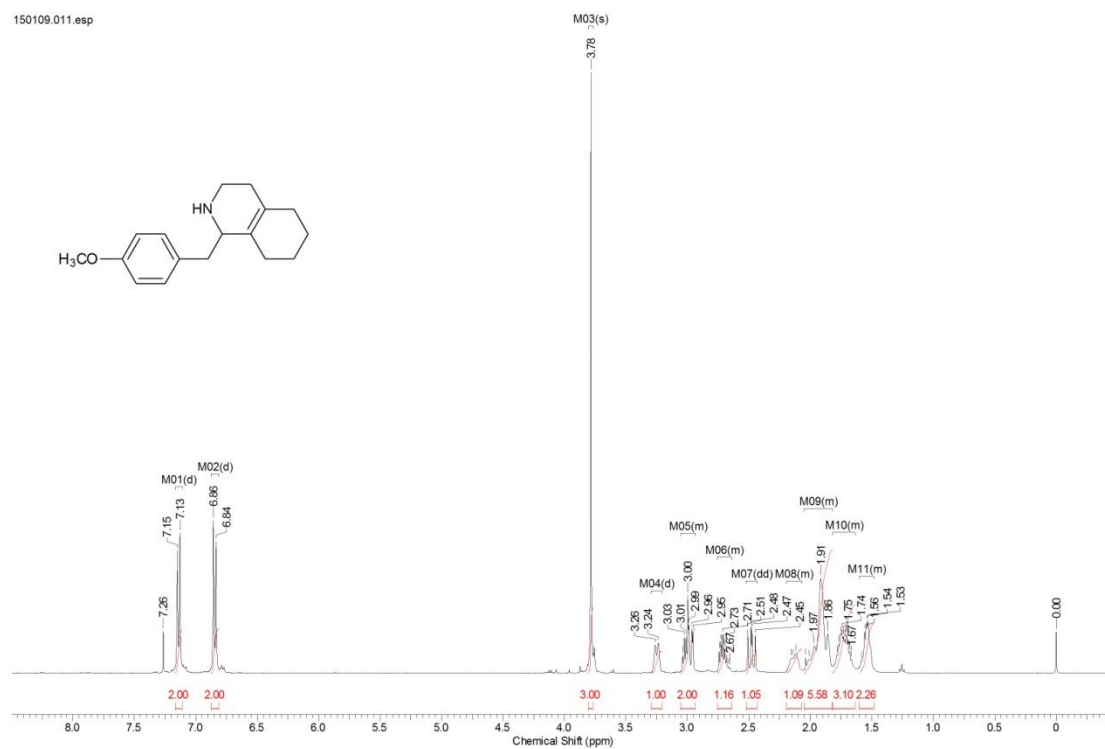

**Fig. S1**  $^1\text{H-NMR}$  spectra of 1-(4-methoxybenzyl)-1, 2, 3, 4, 5, 6, 7, 8-octahydroisoquinoline (**13**)  
 $^1\text{H NMR}$  (600 MHz, DMSO- $d_6$ ) $\delta$ : 7.13 (d,  $J=8.44$  Hz, 2 H), 6.84 (d,  $J=8.44$  Hz, 2 H), 3.72 (s, 3 H), 3.13 (d,  $J=9.54$  Hz, 1 H), 2.89 (dt,  $J=11.83, 5.64$  Hz, 1 H), 2.85 (dd,  $J=13.57, 2.93$  Hz, 1 H), 2.57 - 2.63 (m, 1 H), 2.38 (dd,  $J=13.39, 10.09$  Hz, 1 H), 2.08 (d,  $J=14.67$  Hz, 1 H), 1.74 - 1.92 (m, 5 H), 1.59 - 1.73 (m, 2 H), 1.40 - 1.51 (m, 2 H).

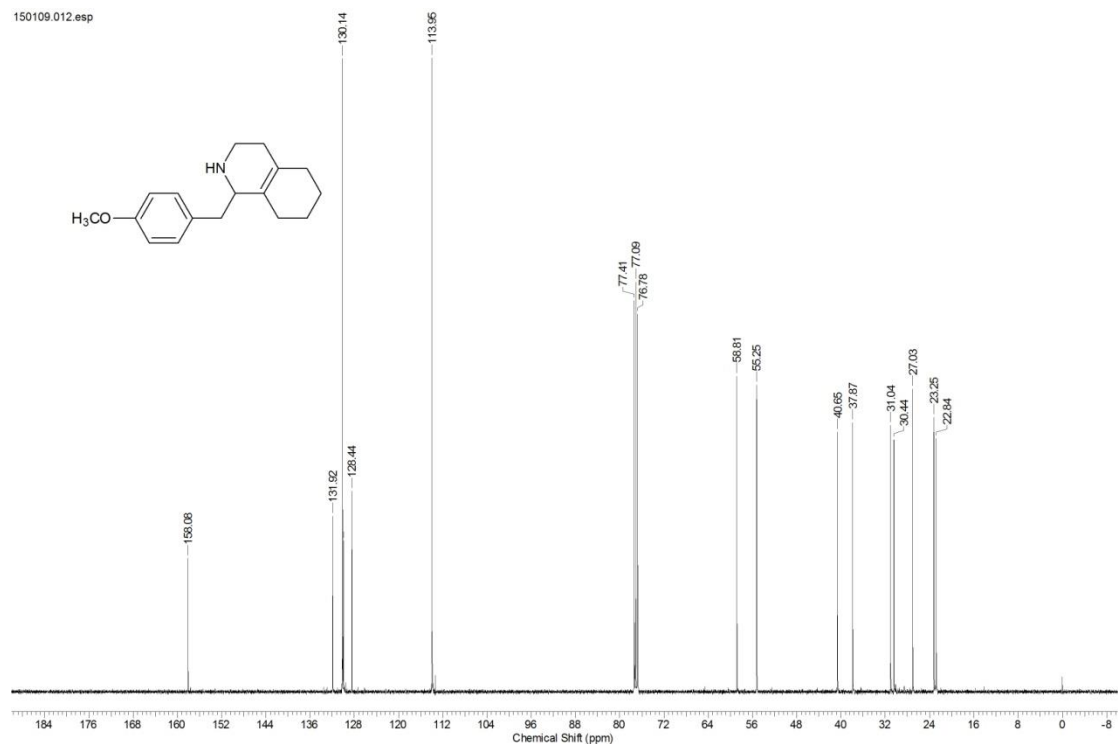

**Fig. S2**  $^{13}\text{C}$ -NMR spectra of 1-(4-methoxybenzyl)-1, 2, 3, 4, 5, 6, 7, 8-octahydroisoquinoline (**13**)  
 $^{13}\text{C}$  NMR (150 MHz, DMSO- $d_6$ )  $\delta$ : 157.38, 131.92, 130.21, 130.01, 127.44, 113.44, 58.15, 54.83, 37.37, 30.50, 29.82, 26.43, 22.74, 22.39.

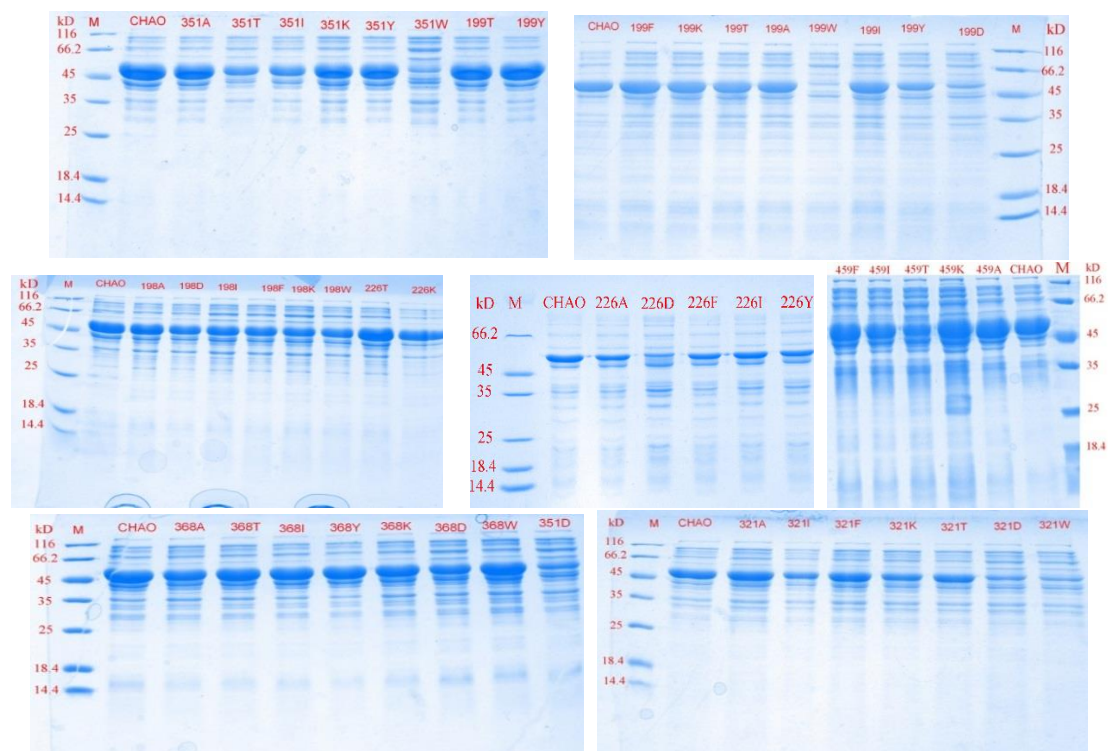

**Fig. S3** SDS-PAGE analysis of the cell-free extracts of CHAO and mutants

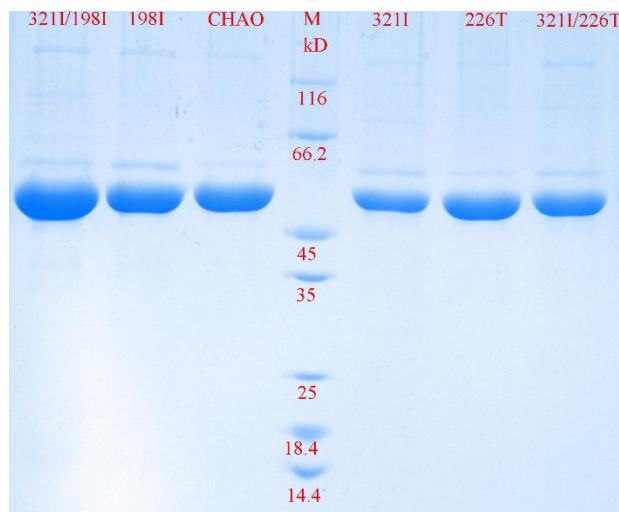

**Fig. S4** SDS-PAGE analysis of the purified CHAO and mutants

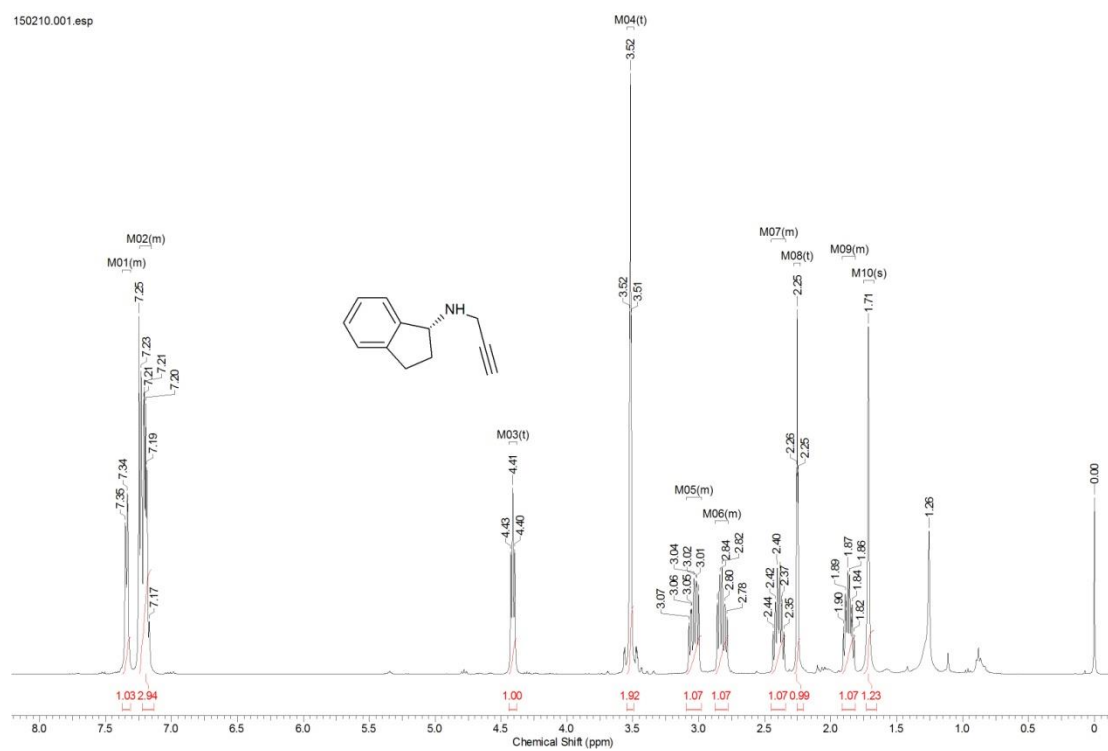

**Fig. S5**  $^1\text{H-NMR}$  spectra of (*S*)-*N*-(prop-2-yn-1-yl)-2,3-dihydro-1H-inden-1-amine ((*R*)-**8**)

150210.002.esp

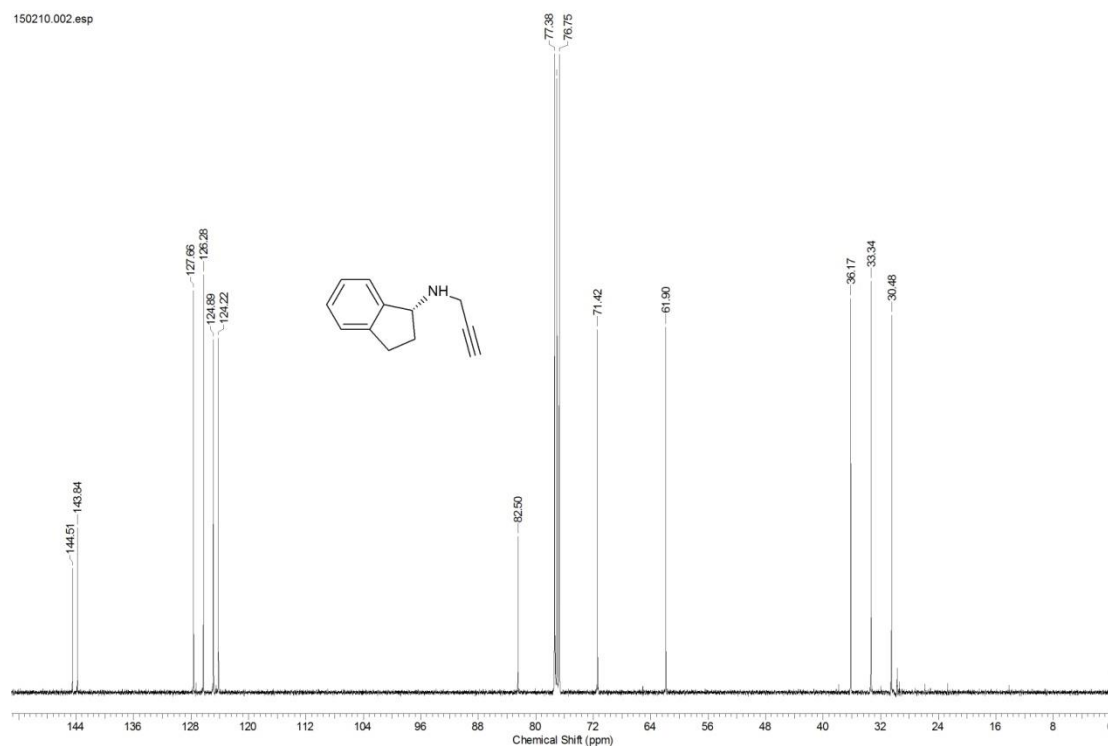

**Fig. S6**  $^{13}\text{C}$ -NMR spectra of *(S)*-*N*-(prop-2-yn-1-yl)-2, 3-dihydro-1H-inden-1-amine (*(R)*-**8**)

150106.003.esp

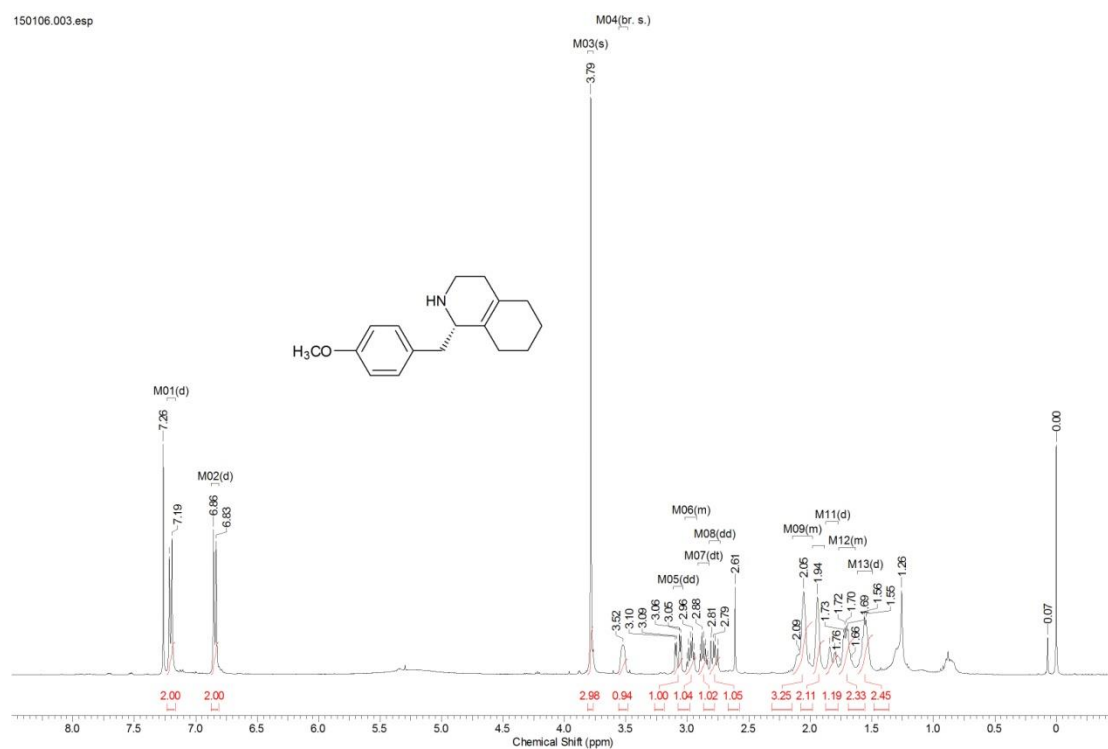

**Fig. S7**  $^1\text{H}$ -NMR spectra of *(S)*-1-(4-methoxybenzyl)-1, 2, 3, 4, 5, 6, 7, 8-octahydroisoquinoline (*(S)*-**13**)

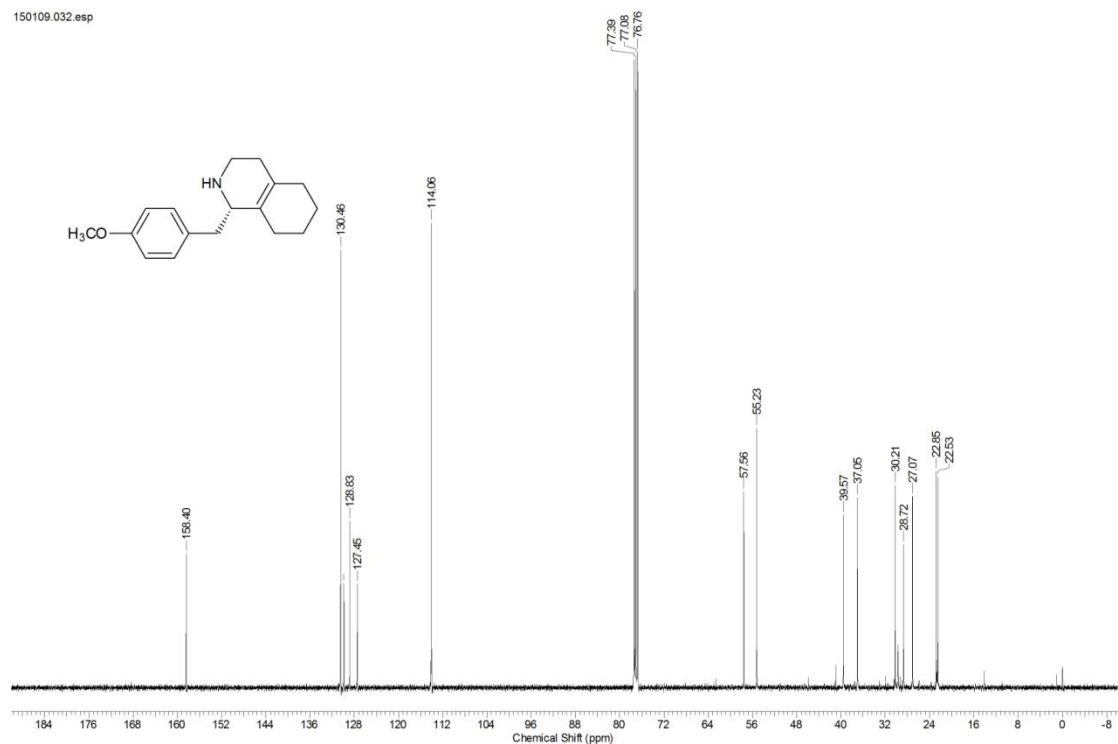

**Fig. S8**  $^{13}\text{C}$ -NMR spectra of *(S)*-1-(4-methoxybenzyl)-1,2,3,4,5,6,7,8-octahydroisoquinoline ((*S*)-13)
